# Supplementary material for: A ratiometric fluorescence nanosensor for highly selective and sensitive detection of selenite
Source: Royal Society of Chemistry journal article supplement (doi:10.1039/c6an00740f), 2016-01-01
Supplement: c6an00740f1.pdf [file c6an00740f1.pdf]

## Supporting Information

### A ratiometric fluorescence nanosensor for highly selective and sensitive detection of selenite

Linfeng Chen<sup>a</sup>, Xike Tian<sup>a,\*</sup>, Yuan Zhao<sup>a</sup>, Yong Li<sup>a,\*</sup>, Chao Yang<sup>a</sup>,  
Zhaoxin Zhou<sup>a</sup>, Xiangwen Liu<sup>a,b</sup>

<sup>a</sup> Faculty of Material Science and Chemical Engineering, China University of Geosciences,  
Wuhan 430074, P R China

<sup>b</sup> State Key Laboratory of Geological Processes and Mineral Resources, China University of  
Geoscience, Wuhan 430074, P R China

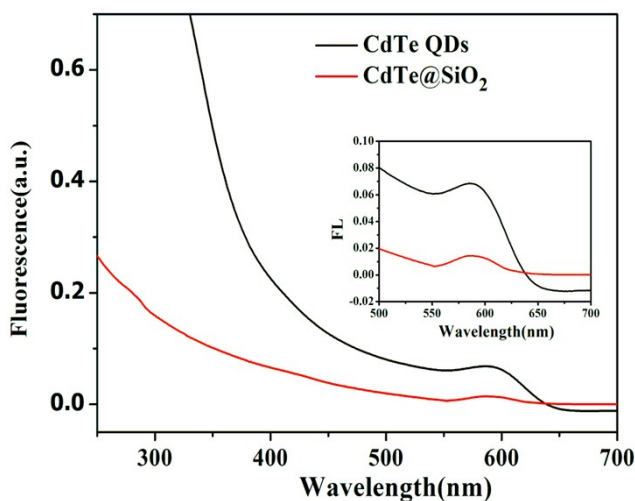

**Fig. S1** Absorption spectra of CdTe QDs and CdTe@SiO<sub>2</sub>. Inset: the enlarged drawing between 500-700nm. The measurements were operated in 6:4 isopropanol/H<sub>2</sub>O solutions.

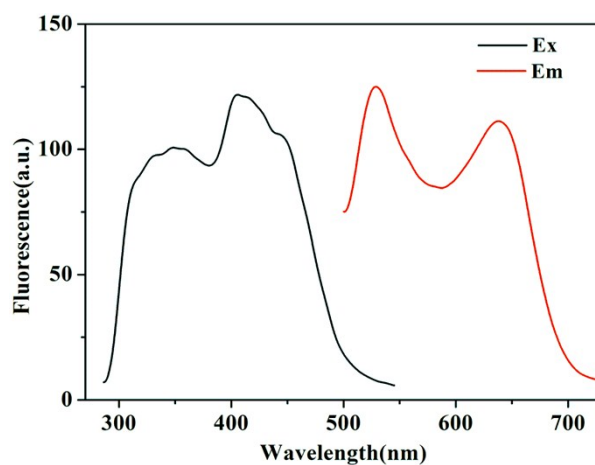

**Fig. S2** Excitation spectrum of Se-DAB (black line) and the emission spectrum of Se-nanosensor (red line), excited at 415nm. The measurements were operated in 6:4 isopropanol/H<sub>2</sub>O solutions.

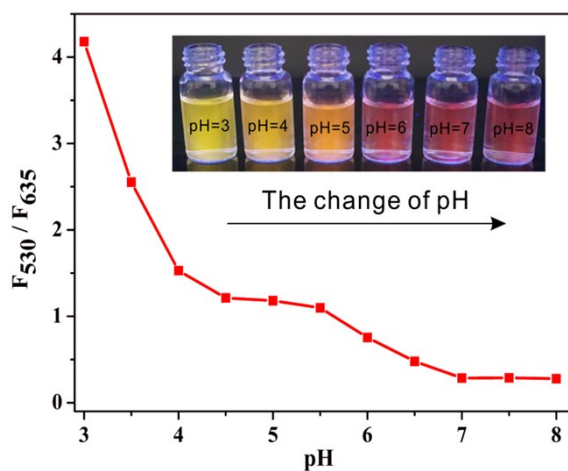

**Fig. 3** The effect of different pH on the fluorescence intensity ratio of the Se-nanosensor. The inset images are their corresponding fluorescence images taken under a UV lamp (365 nm).

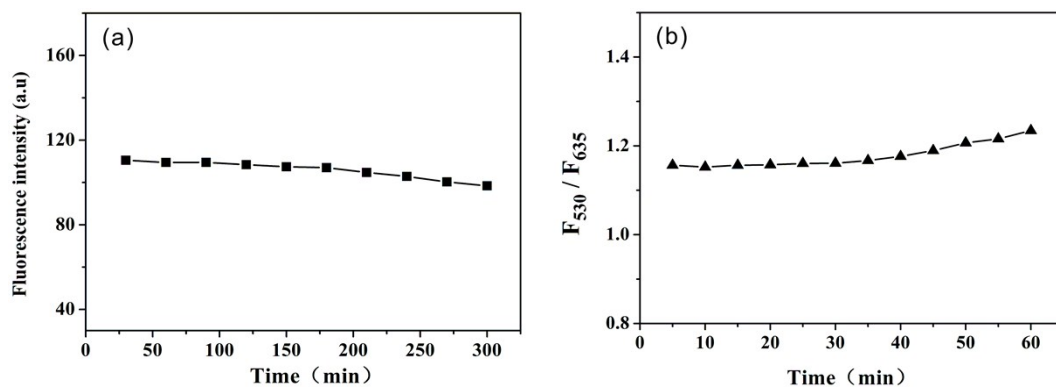

**Fig. S4** (a) The stability of the DAB-CdTe@SiO<sub>2</sub> QDs nanosensor in the acetic acid-sodium acetate buffer solution (pH=4.5, 0.02M). (b) Fluorescence intensity ratio ( $F_{530}/F_{635}$ ) of the nanosensor under consecutive irradiation for 60 min. The measurements were operated in 6:4 isopropanol/H<sub>2</sub>O solutions.

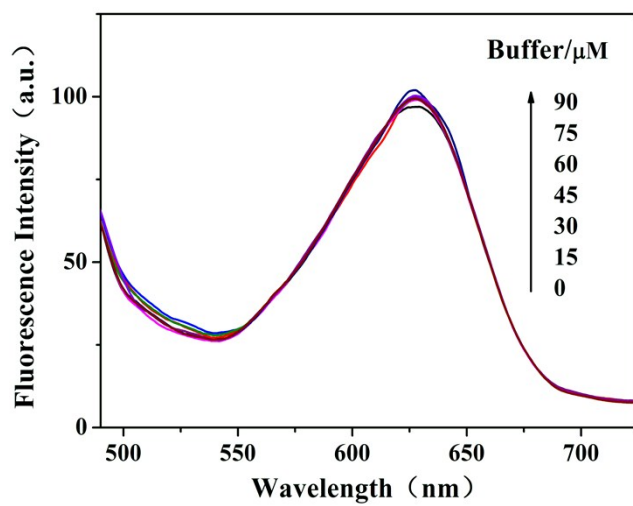

**Fig. S5** The fluorescence response of the ratiometric nanosensor upon the addition of different concentration of acetic acid-sodium acetate buffer solution.

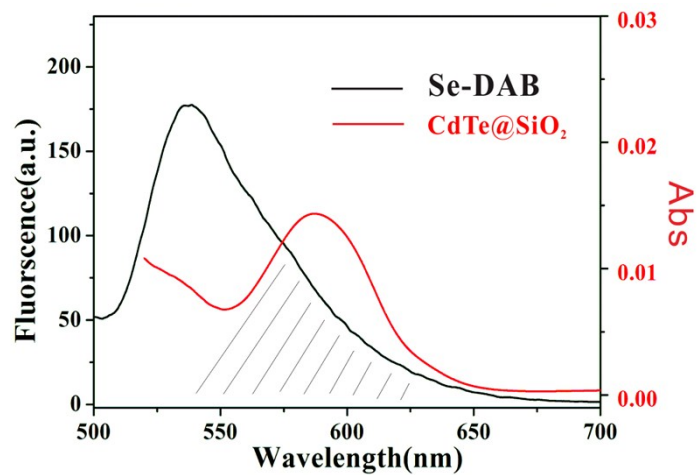

**Fig. S6** Absorption spectrum of CdTe@SiO<sub>2</sub> QDs (red line) and emission spectrum of Se-DAB (black line), excited at 415nm. The measurements were operated in 6:4 isopropanol/H<sub>2</sub>O solutions.

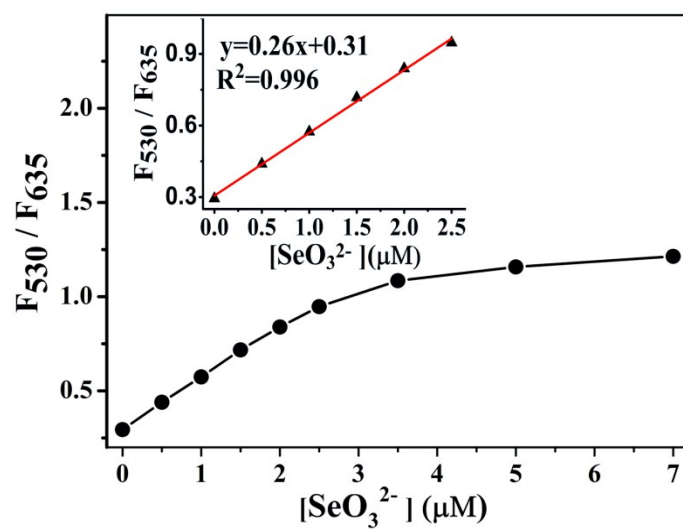

**Fig. S7** Plot of fluorescence intensity ratio of  $F_{530}/F_{635}$  versus the concentration of  $\text{SeO}_3^{2-}$ . Inset: linearity of the  $F_{530}/F_{635}$  with respect to the  $\text{SeO}_3^{2-}$  concentration over the range of 0-2.5  $\mu\text{M}$ .

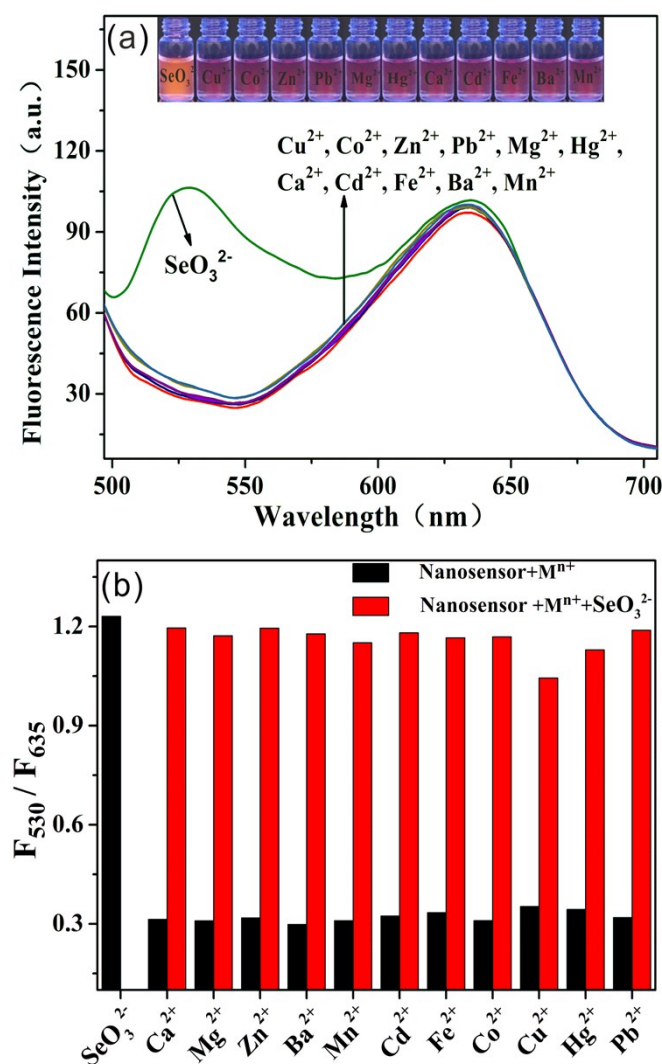

**Fig. S8** (a) Fluorescence response of the ratiometric nanosensor to different metal ions (10 $\mu$ M for all ions, excitation at 415nm). The inset images were taken under a 365nm UV lamp. (b) The selectivity of the ratiometric nanosensor to various common metal ions. The black bars represent addition of different metal ions at 10 $\mu$ M, and the red bars represent the change of emission occurred following the subsequent addition of 10 $\mu$ M of Se (IV) to the above solutions

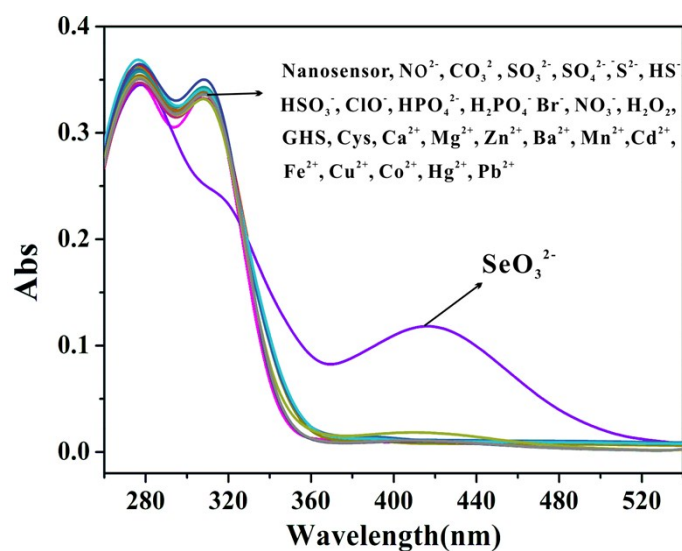

**Fig. S9** Absorption spectra of nanosensor with various interference substances (3  $\mu\text{M}$ ) in isopropanol and water (v/v = 6/4).

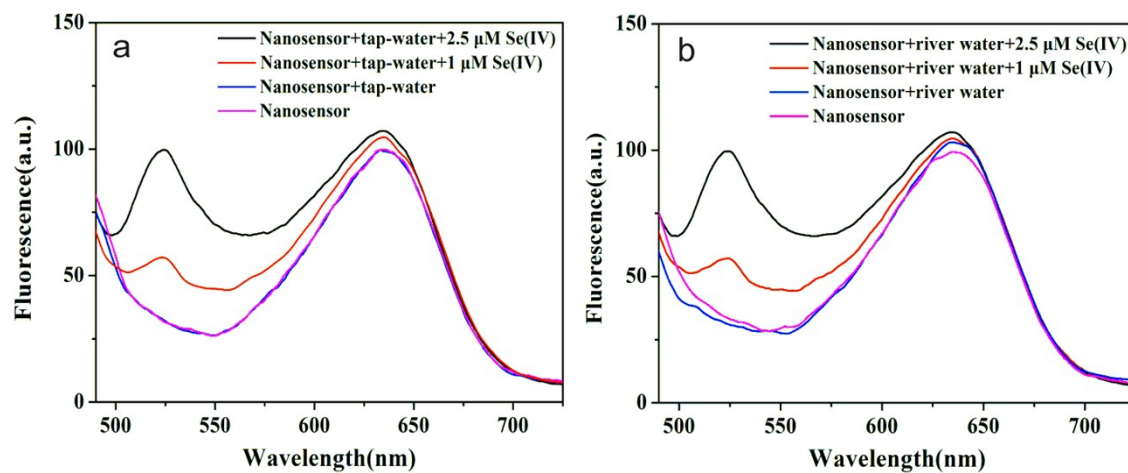

**Fig. S10 (a)** The fluorescence spectra of the recovery test in tap water. **(b)** The fluorescence spectra of the recovery test in Yangtze River water.
